# Supplementary material for: Whole-exome sequencing of alpha-fetoprotein producing gastric carcinoma reveals genomic profile and therapeutic targets
Source: PubMed Central journal article supplement (PMC8225795; doi:10.1038/s41467-021-24170-0), 2021-06-24
Supplement: 41467_2021_24170_MOESM1_ESM.pdf [file 41467_2021_24170_MOESM1_ESM.pdf]

# **Whole-exome sequencing of alpha-fetoprotein producing gastric carcinoma reveals genomic profile and therapeutic targets**

## **Supplementary Informations**

**Supplementary Figures 1- 13**

**Supplementary Table 1- 8**

**Supplementary Method**

**Supplementary References**

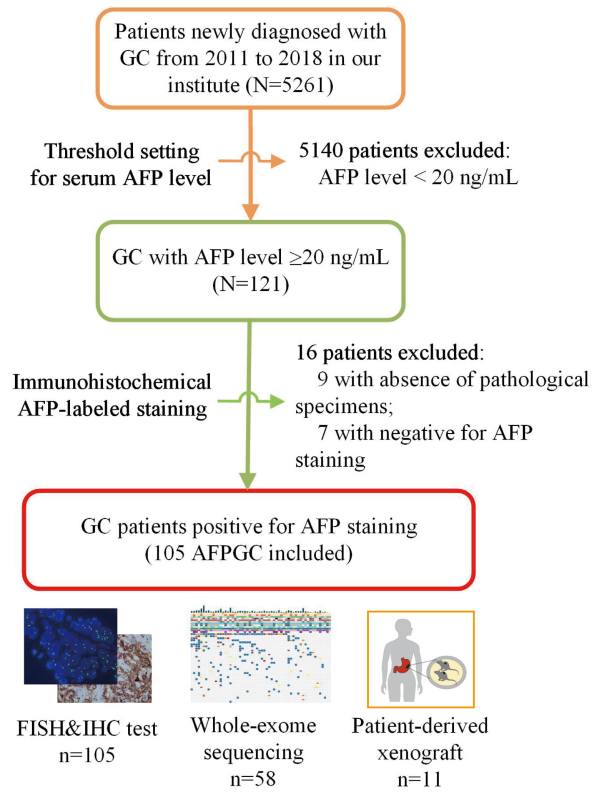

**Supplementary Fig. 1. Study workflow.** GC, gastric cancer; AFP, alpha-fetoprotein; AFPGC, alpha-fetoprotein producing gastric carcinoma; IHC, immunohistochemistry; FISH, fluorescence in situ hybridization.

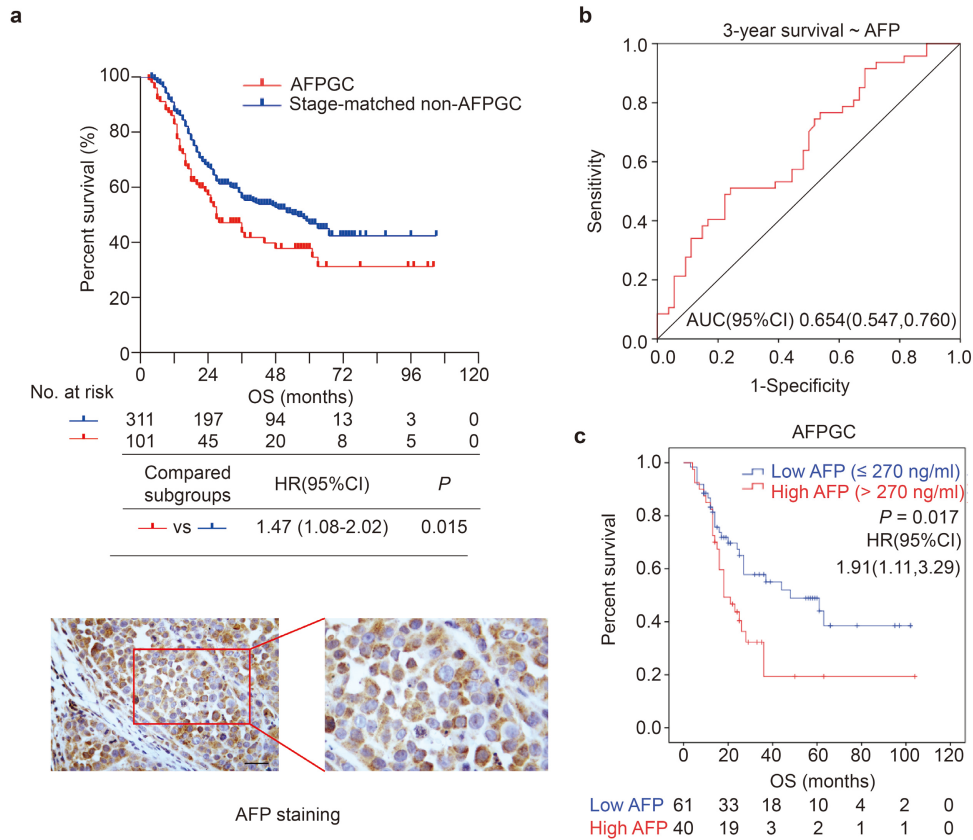

**Supplementary Fig. 2. Survival analysis for AFPGC.** (a) Survival analysis of patients with AFPGC and stage-matched non-AFPGC in our institution. One representative IHC staining of AFP-positive status is shown. (b) ROC curve analysis for evaluating the 3-year survival value of serum AFP level. (c) The serum AFP level of AFPGC was associated with overall survival. Low AFP level ( $20 \text{ ng/ml} \leq \text{serum AFP} \leq 270 \text{ ng/ml}$ ); High AFP level ( $270 \text{ ng/ml} < \text{Serum AFP}$ ); Statistical significance was determined using log-rank (Mantel–Cox) test (a, c). Non-AFPGC, AFP-negative gastric carcinoma; OS, overall survival; HR, hazard ratio; CI, confidence interval; IHC, immunohistochemistry; AUC, area under the ROC curve; ROC, receiver-operating characteristic.

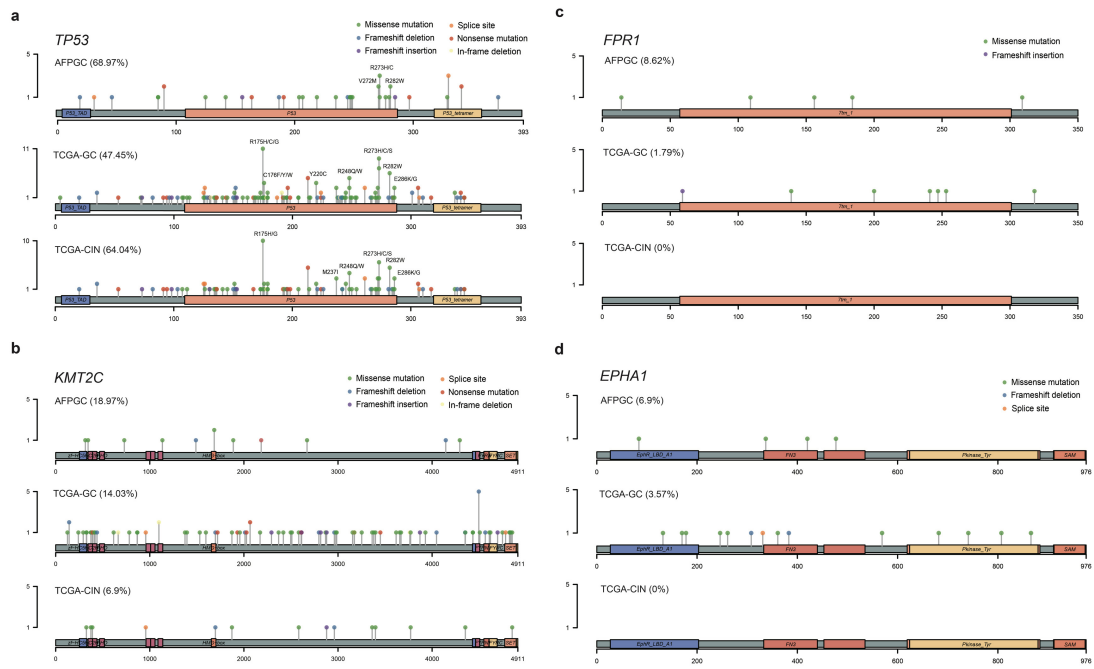

**Supplementary Fig. 3. Distribution of non-synonymous somatic mutations in frequently mutated genes in AFPGC, TCGA-GC, and TCGA-CIN. (a) TP53; (b) KMT2C; (c) FPR1; (d) EPHA1.**

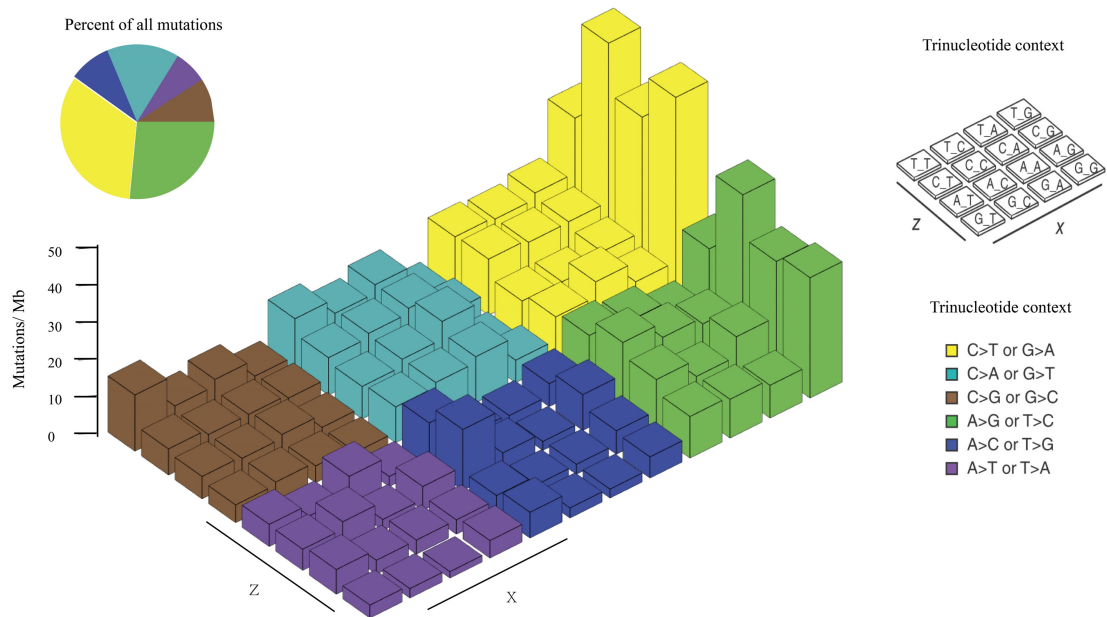

**Supplementary Fig. 4. Mutation spectrum analysis of AFPGC.** Mutation spectrum is derived from 58 paired samples of AFPGC subjected to WES. Base substitutions are divided into 96 mutation types. The height of the bar represents the somatic mutation number of base substitutions.

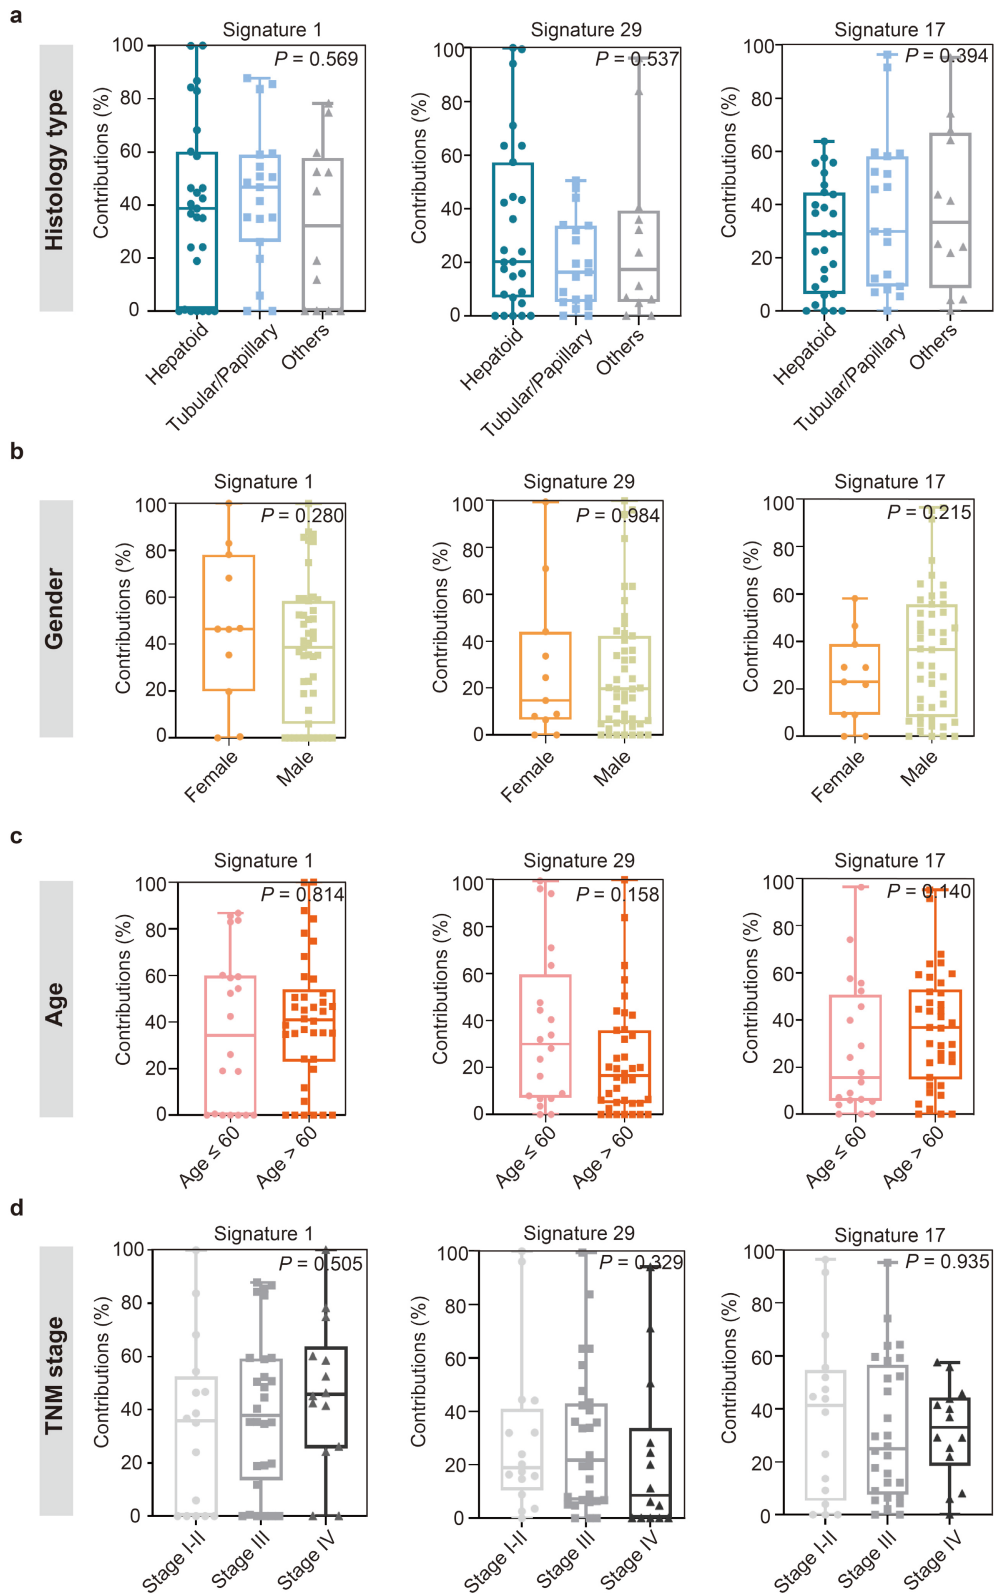

**Supplementary Fig. 5. Association between signature contributions and clinicopathological characteristics.** (a) Histology type; (b) Gender; (c) Age; (d) TNM stage. Box plots show the median (central line), the 25–75% interquartile range (IQR) (box limits), the  $\pm 1.5$  times IQR (Tukey whiskers), and all data points, among which the lowest and the highest points indicate minimal and

maximal values, respectively. Statistical significance was determined using Kruskal-Wallis test (a, d) and two-tailed Mann-Whitney U test (b, c).  $P < 0.05$  was considered significant.

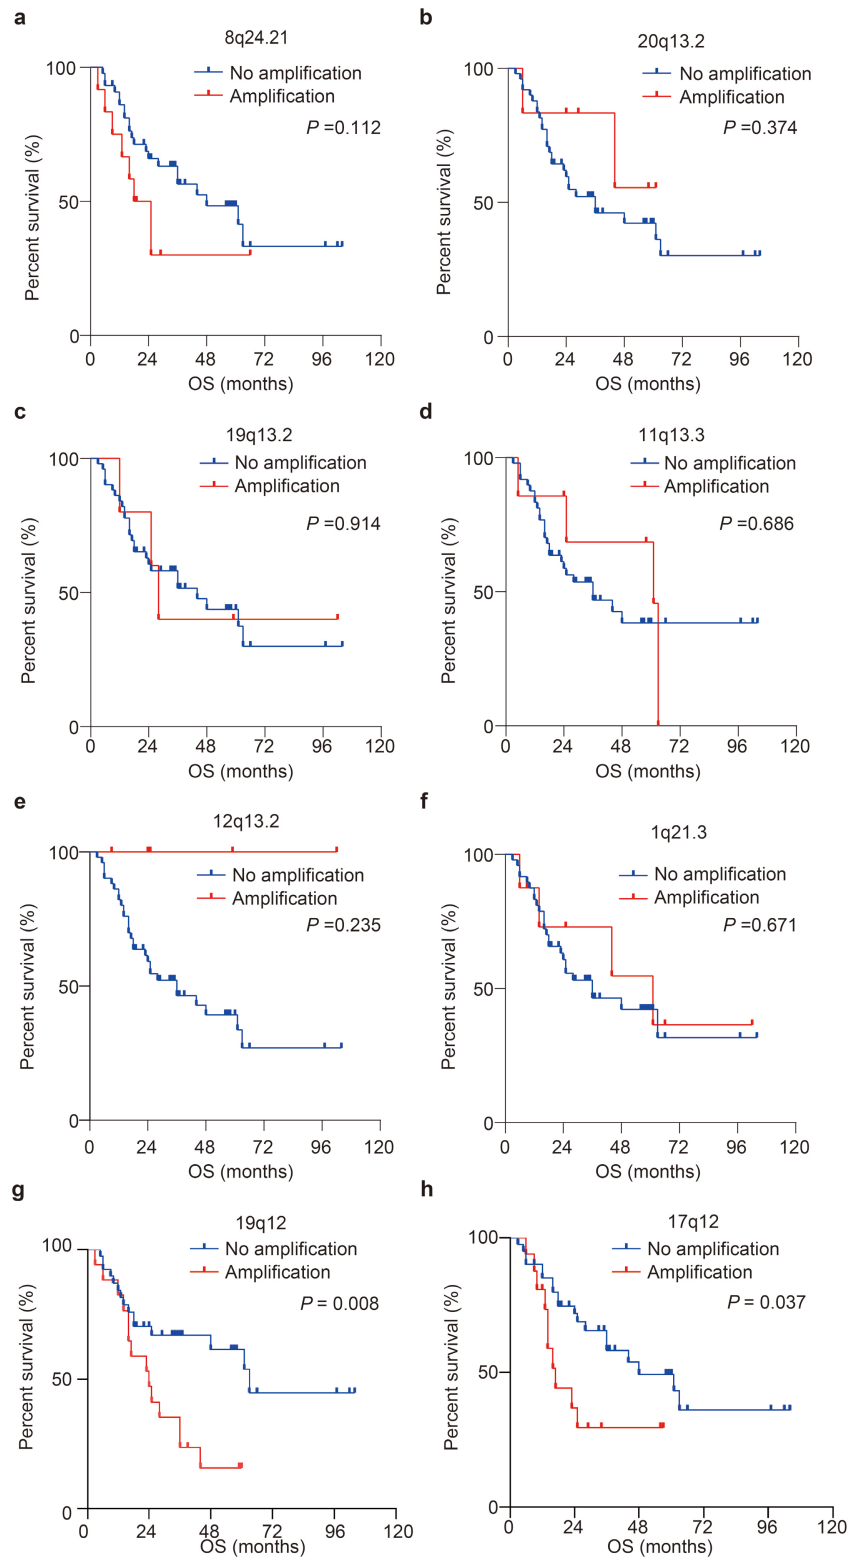

**Supplementary Fig. 6. Survival analysis of frequent SCNAs in AFPGC cohort.** Patients were divided into two subgroups according to the status of chromosome segment amplification in **(a)** 8q24.21; **(b)** 20q13.2; **(c)** 19q13.2; **(d)** 11q13.3; **(e)** 12q13.2; **(f)** 1q21.3; **(g)** 19q12; **(h)** 17q12. Statistical significance was determined using log-rank (Mantel–Cox) test. OS, overall survival.



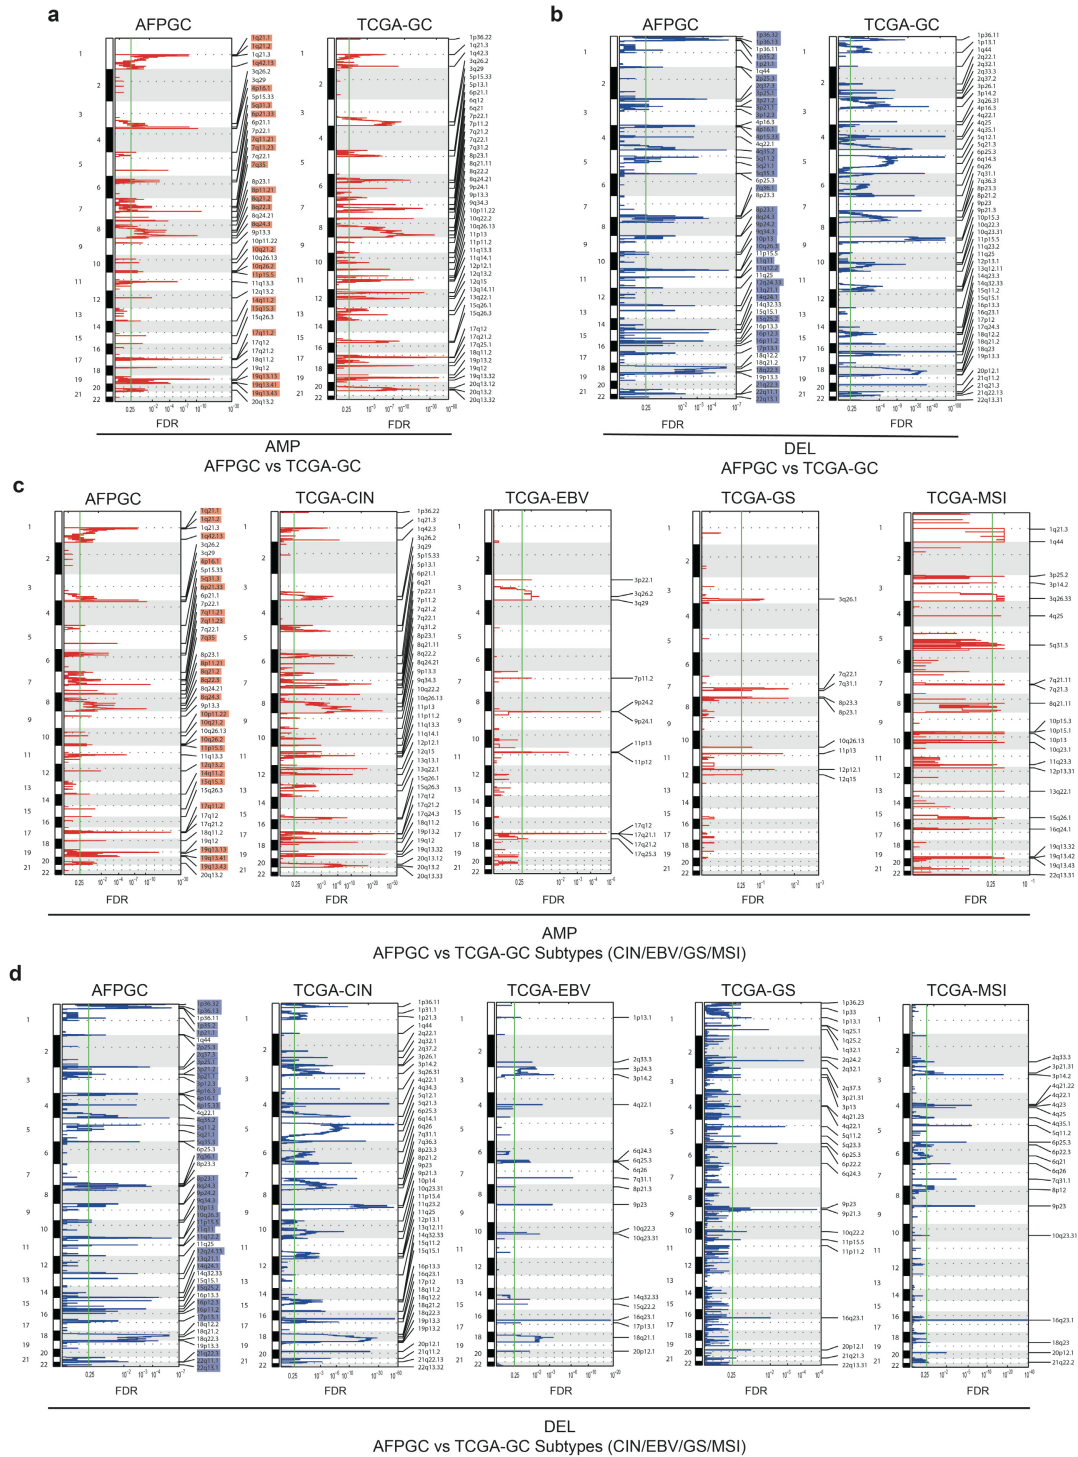

**Supplementary Fig. 7. GISTIC 2.0 significant SCNAs in AFPGC and gastric cancer from TCGA.** The comparison of AFPGC and TCGA-GC in amplifications (a) and deletions (b). The comparison of AFPGC and TCGA-GC subtypes in amplifications (c) and deletions (d). Chromosomal locations of peaks of significant focal amplifications (red) and deletions (blue) are plotted by FDR. Annotated regions have an FDR < 0.25, and regions highlighted in red or blue were specific for AFPGC comparing with TCGA-GC or TCGA-CIN. FDR, false discovery rate; AMP, amplification; DEL, deletion; TCGA, The Cancer Genome Atlas; CIN, chromosomal instability; GS, genomically stable; EBV, Epstein-Barr virus; MSI, microsatellite instability.

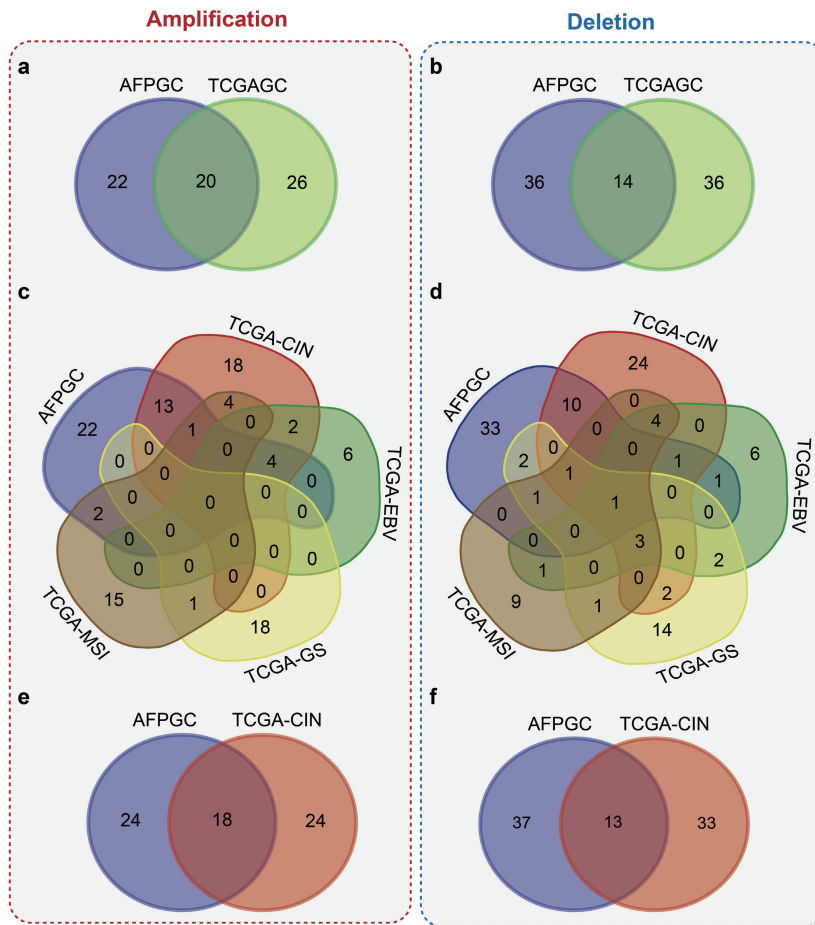

**Supplementary Fig. 8. Overlap of significant SCNAs between AFPGC and gastric cancer from TCGA.** The Venn diagram displays the joint regions in GISTIC 2.0 amplifications (a) and deletions (b) between AFPGC and TCGA-GC, amplifications (c) and deletions (d) between AFPGC and TCGA subtypes, amplifications (e) and deletions (f) between AFPGC and TCGA-CIN subtype.

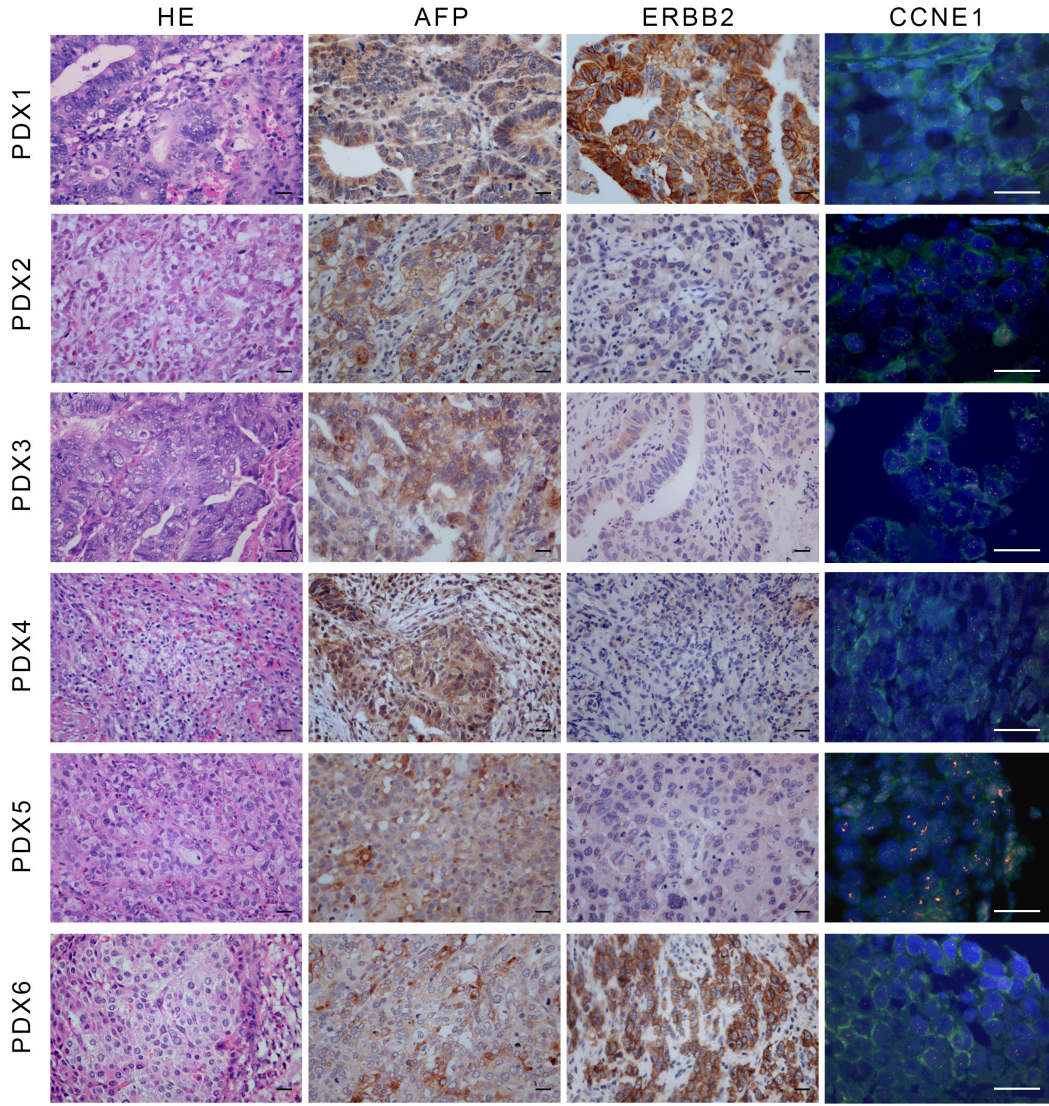

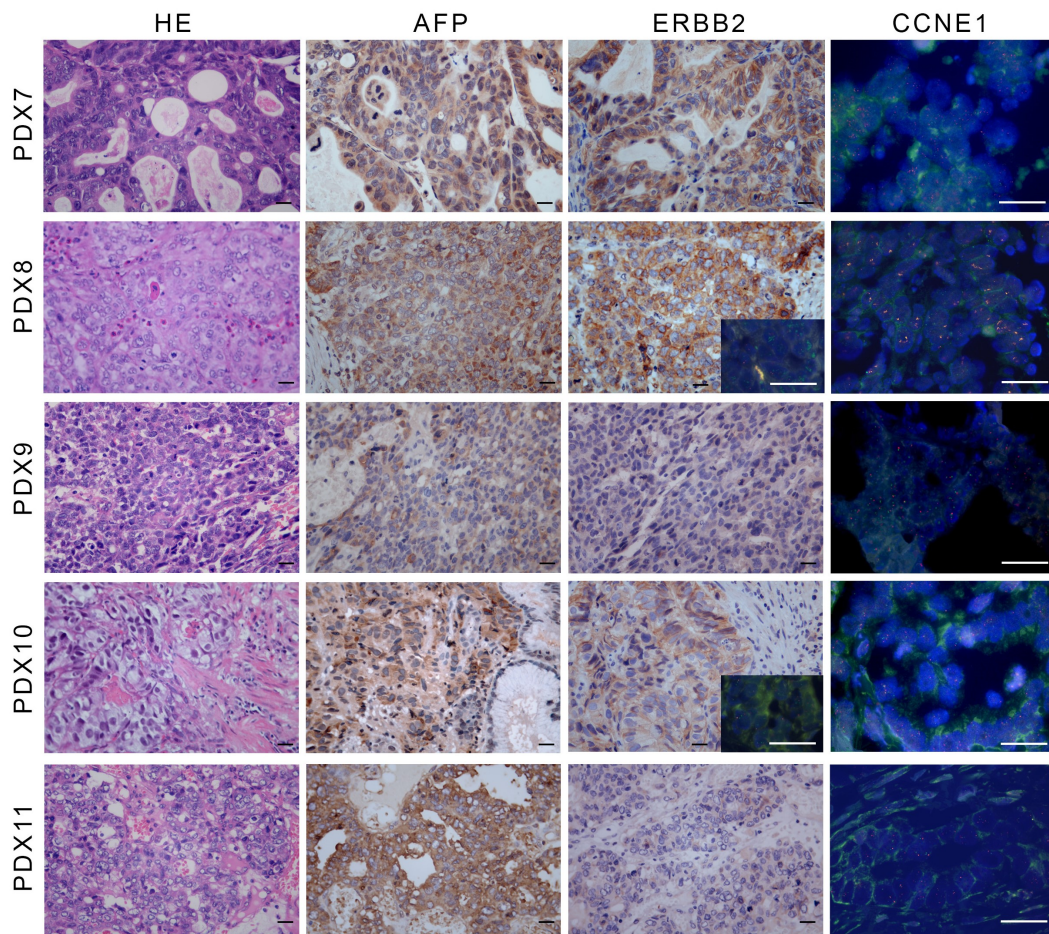

**Supplementary Fig. 9. Representatives of pathological and immunohistochemical features of AFPGC PDX models.** Presented data are a representative image of three independent experiments. Each row represents a PDX model, and each column represents a pathological or immunohistochemical marker. HE, Hematoxylin and Eosin. Scale bar represents 50  $\mu$ m.

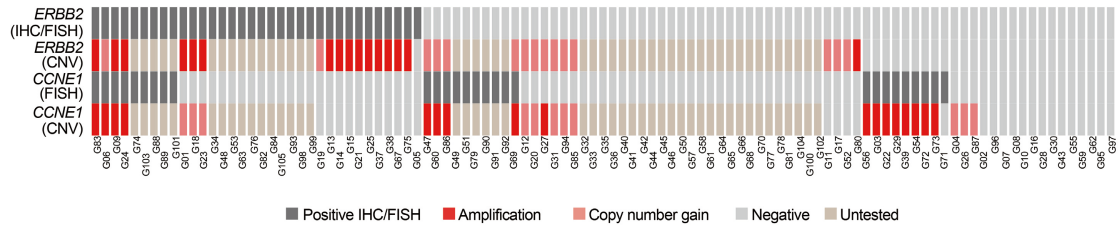

**Supplementary Fig. 10. The status of AFP, ERBB2 and CCNE1 in AFPGC cohort.** The CNVs status of ERBB2 and CCNE1 are defined by the WES result of 58 patients. IHC, immunohistochemistry; FISH, fluorescence in situ hybridization.

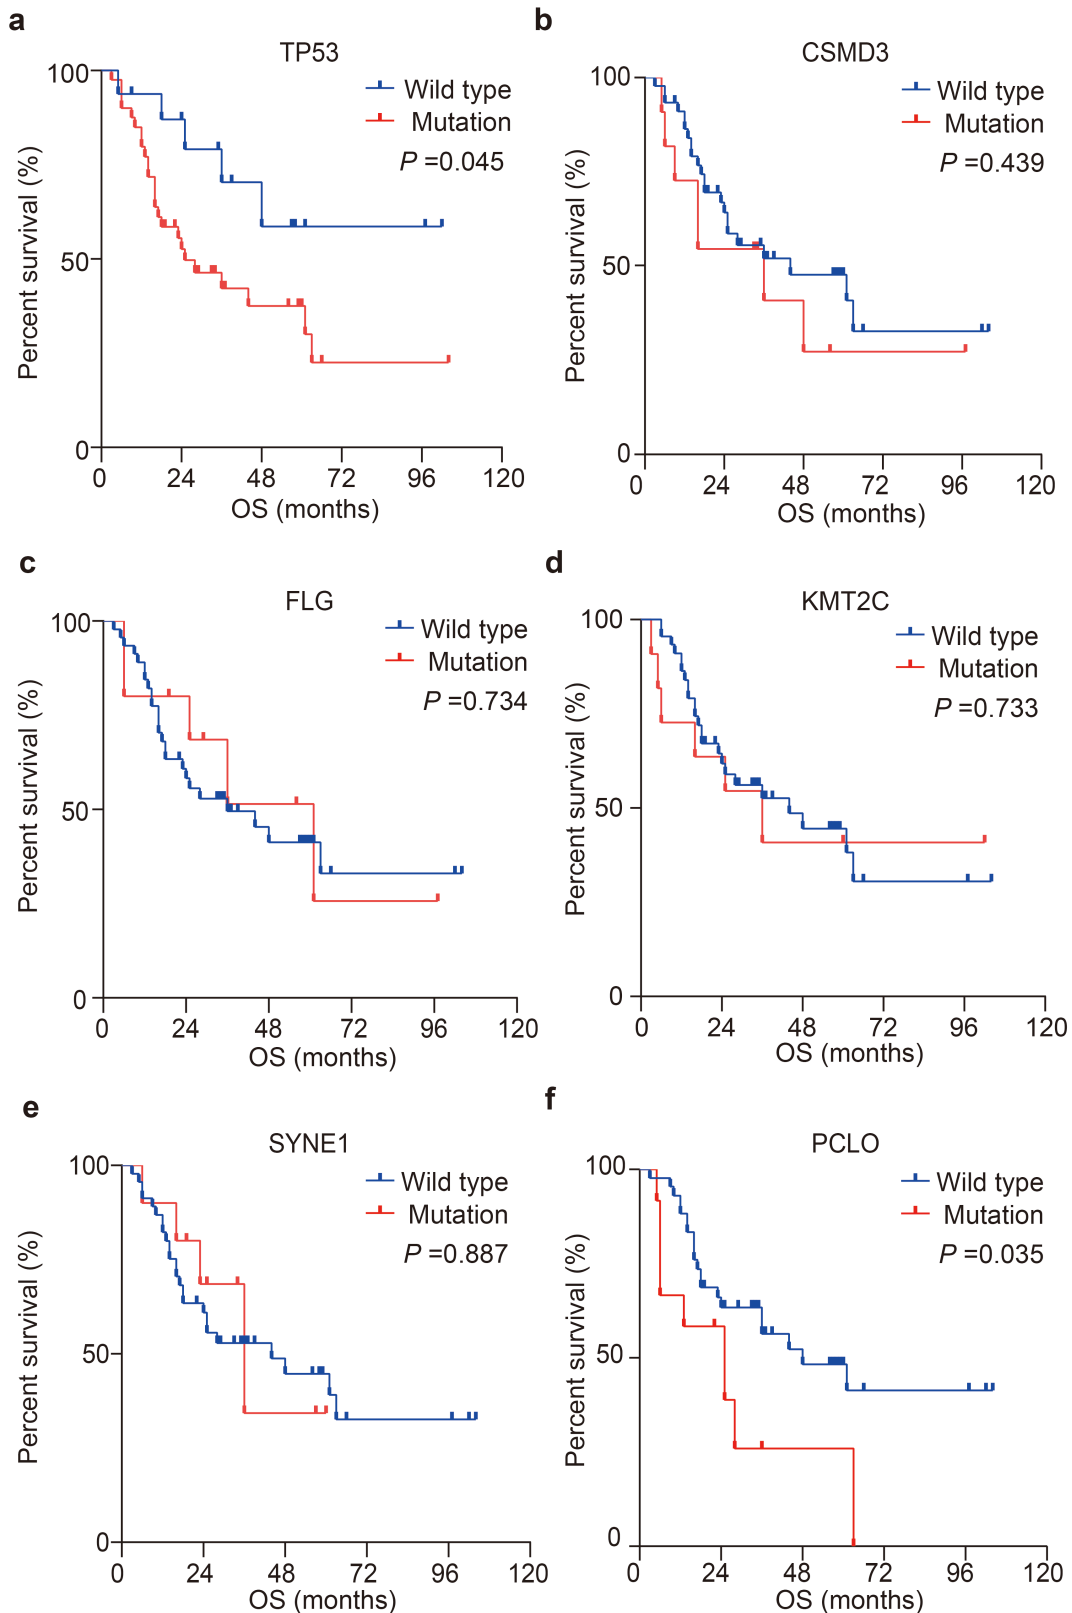

**Supplementary Fig. 11. Survival analysis of significantly mutated genes in AFPGC cohort.** Patients were divided into two subgroups according to the mutated status of genes in (a) TP53; (b) CSMD3; (c) FLG; (d) KMT2C; (e) SYNE1; (f) PCLO. Statistical significance was determined using log-rank (Mantel-Cox) test. OS, overall survival.

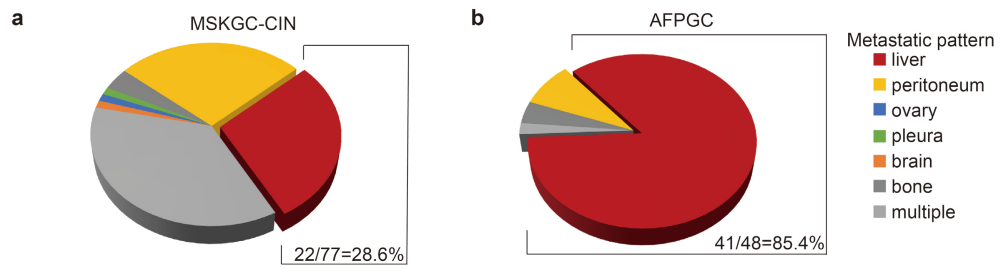

**Supplementary Fig. 12. Comparison of metastatic pattern between MSKGC-CIN subtype (a) and AFPGC (b).** The data of CIN type in MSKGC cohort was downloaded from cBioportal database; MSKGC, gastric cancer from Memorial Sloan Kettering Cancer Center; CIN, chromosomal instability.

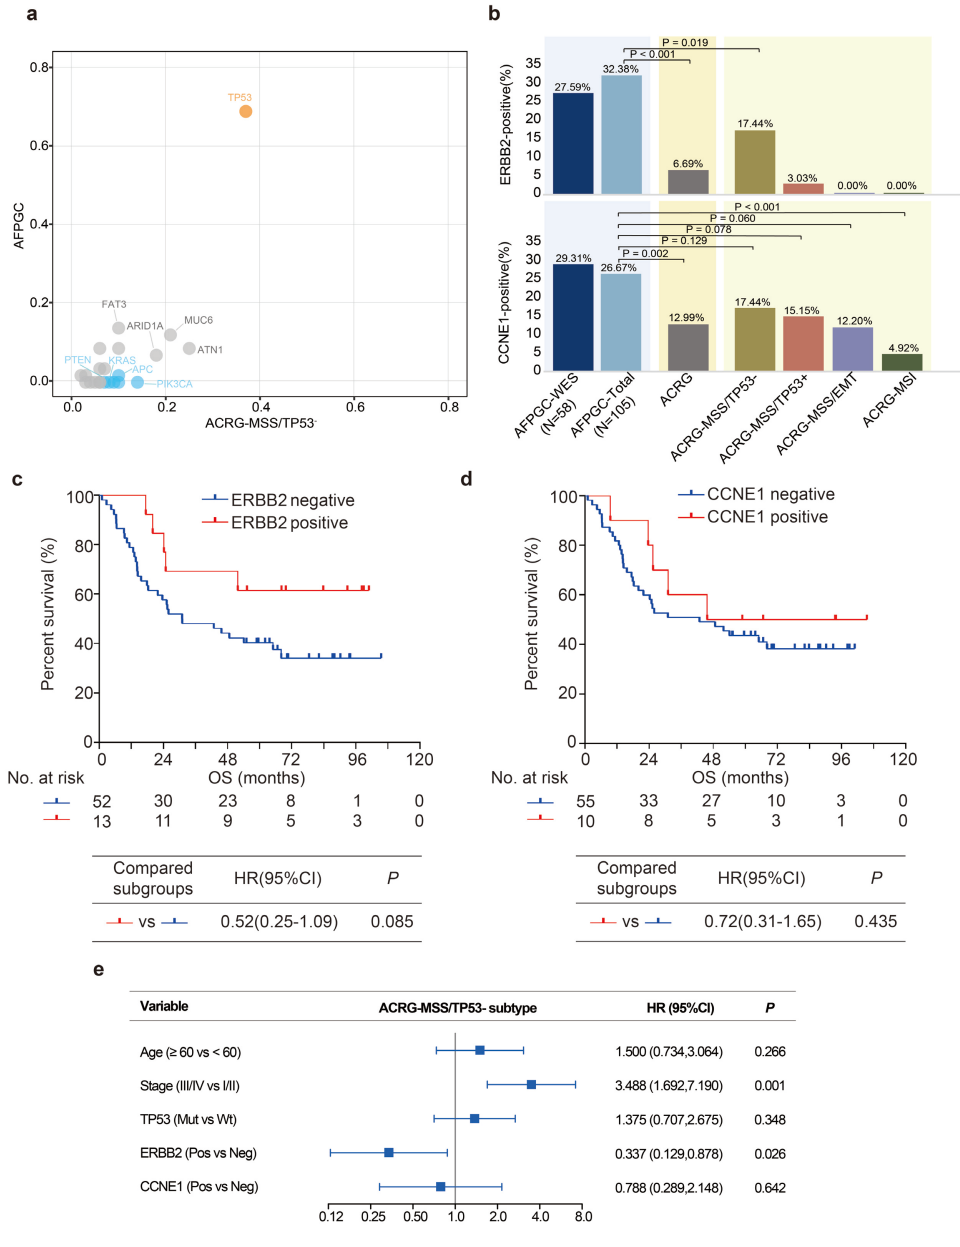

**Supplementary Fig. 13. Comparison of mutated genes and copy number alterations in AFPGC and ACRG-MSS/TP53<sup>-</sup> subtype.** (a) The frequency of mutated genes in AFPGC and gastric cancer from ACRG. Orange or blue dots represents the genes in AFPGC with significantly higher or lower mutation frequency than those in ACRG-MSS/TP53<sup>-</sup> subtype. (b) The frequency of ERBB2 and CCNE1 amplifications in AFPGC and gastric cancer from ACRG. (c-d) Association between the status of ERBB2 (c) or CCNE1 (d) and OS in ACRG-MSS/TP53<sup>-</sup> subtype. (e) Forest plot of multivariable cox proportional hazard regression in ACRG-MSS/TP53<sup>-</sup> subtype. The hazard ratios are presented and the horizontal lines indicate the 95% confidence intervals. Statistical significance was determined using two-sided chi-square test (b), log-rank (Mantel-Cox) test (c, d), and multivariate COX regression (e). ACRG, the Asian Cancer Research Group; MSS, microsatellite stability; MSI, microsatellite instability; EMT, epithelial-mesenchymal transformation; Mut, mutation; WT, wild type; OS, overall survival; HR, hazard ratio; CI, confidence interval; Pos, positive; Neg, negative.



**Supplementary Table 1. Clinicopathological characteristics of 105 AFPGC patients.**

| <b>Characteristic</b>             | <b>No. (%) of patients</b> |
|-----------------------------------|----------------------------|
| <b>Sex</b>                        |                            |
| Male                              | 79(75.2)                   |
| Female                            | 26(24.8)                   |
| <b>Age (years)</b>                |                            |
| Median                            | 64                         |
| Range                             | (30,83)                    |
| <b>Age classification (years)</b> |                            |
| ≥60                               | 78(74.3)                   |
| <60                               | 27(25.7)                   |
| <b>Smoking</b>                    |                            |
| Yes                               | 49(46.7)                   |
| No                                | 48(45.7)                   |
| Unspecified                       | 8(7.6)                     |
| <b>Operation type</b>             |                            |
| Radical                           | 75(71.4)                   |
| Palliative                        | 12(11.4)                   |
| No surgery                        | 18(17.1)                   |
| <b>Primary lesion site</b>        |                            |
| Cardia                            | 24(22.9)                   |
| Body                              | 21(20.0)                   |
| Antrum                            | 55(52.4)                   |
| Unspecified                       | 5(4.8)                     |
| <b>TNM stage</b>                  |                            |
| I-II                              | 33(31.4)                   |
| III-IV                            | 72(68.6)                   |
| <b>Differentiation</b>            |                            |
| Hepatoid                          | 46(43.8)                   |
| Tubular/Papillary                 | 43(41.0)                   |
| Others                            | 16(15.2)                   |
| <b>Lymphovascular invasion</b>    |                            |
| Positive                          | 62(59.0)                   |
| Negative                          | 29(27.6)                   |
| NA*                               | 14(13.3)                   |
| <b>Liver metastasis</b>           |                            |
| Yes                               | 42(40.0)                   |
| No                                | 62(59.0)                   |
| NA**                              | 1(1.0)                     |

NA, not applicable

\*The pathologic report did not indicate the presence of lymphovascular invasion

\*\*No follow-up information was available to confirm the presence of liver metastases

**Supplementary Table 2. Significantly mutated genes in 58 paired AFPGC samples.**

| Gene    | Indels | SNVs | Total Mutations | Covd Bps | Muts pMbp | P-value LRT | P-value CT | FDR LRT  | FDR CT   |
|---------|--------|------|-----------------|----------|-----------|-------------|------------|----------|----------|
| TP53    | 7      | 33   | 40              | 108022   | 370.29    | 0           | 0          | 0        | 0        |
| PCLO    | 5      | 7    | 12              | 920762   | 13.03     | 0.001787    | 0.000247   | 0.13857  | 0.112819 |
| CSMD3   | 1      | 12   | 13              | 689107   | 18.86     | 3.38E-08    | 2.03E-09   | 0.000324 | 1.95E-05 |
| KMT2C   | 3      | 9    | 12              | 862080   | 13.92     | 0.000121    | 1.56E-05   | 0.044304 | 0.019975 |
| LRP1B   | 1      | 10   | 11              | 842401   | 13.06     | 3.34E-05    | 6.08E-06   | 0.023575 | 0.009938 |
| SYNE1   | 1      | 11   | 12              | 1591244  | 7.54      | 0.003129    | 0.000288   | 0.169938 | 0.125346 |
| FLG     | 4      | 9    | 13              | 718676   | 18.09     | 7.23E-05    | 1.28E-06   | 0.036452 | 0.006118 |
| ZFH4    | 1      | 8    | 9               | 638873   | 14.09     | 0.012987    | 0.000398   | 0.24023  | 0.155832 |
| COL11A1 | 0      | 7    | 7               | 354234   | 19.76     | 1.75E-06    | 6.22E-06   | 0.004638 | 0.009938 |
| MDC1    | 3      | 5    | 8               | 378935   | 21.11     | 0.00013     | 4.41E-05   | 0.046243 | 0.040205 |
| HCN1    | 0      | 5    | 5               | 166507   | 30.03     | 1.75E-05    | 0.000175   | 0.017684 | 0.089813 |
| PRDM1   | 1      | 4    | 5               | 179854   | 27.8      | 0.002677    | 0.000512   | 0.160823 | 0.171304 |
| ERBB2   | 1      | 5    | 6               | 250166   | 23.98     | 9.81E-05    | 0.000195   | 0.041841 | 0.095898 |
| ERBB4   | 0      | 4    | 4               | 242316   | 16.51     | 0.004741    | 0.001133   | 0.19009  | 0.238644 |
| FPR1    | 0      | 5    | 5               | 71680    | 69.75     | 3.14E-05    | 3.14E-06   | 0.023164 | 0.009938 |
| PRKRIR  | 1      | 4    | 5               | 130947   | 38.18     | 0.000304    | 3.28E-05   | 0.063793 | 0.033108 |
| PCDH18  | 0      | 5    | 5               | 229370   | 21.8      | 0.000268    | 0.000336   | 0.060727 | 0.133974 |
| CHL1    | 0      | 5    | 5               | 229642   | 21.77     | 8.37E-05    | 0.000123   | 0.040089 | 0.07015  |
| SPARCL1 | 2      | 2    | 4               | 125340   | 31.91     | 6.79E-05    | 0.000264   | 0.035153 | 0.117821 |
| SLITRK2 | 0      | 4    | 4               | 158936   | 25.17     | 0.00033     | 0.000333   | 0.06535  | 0.133974 |
| PCDHB2  | 1      | 3    | 4               | 152261   | 26.27     | 0.003683    | 0.000789   | 0.177475 | 0.220696 |
| SLCO4C1 | 1      | 3    | 4               | 147501   | 27.12     | 0.001865    | 0.001045   | 0.139631 | 0.228538 |
| EPHA1   | 0      | 4    | 4               | 207203   | 19.3      | 0.003871    | 0.001018   | 0.181289 | 0.228538 |
| ZNF479  | 0      | 3    | 3               | 104175   | 28.8      | 0.001531    | 0.000705   | 0.131213 | 0.204849 |
| MSR1    | 2      | 3    | 5               | 111777   | 44.73     | 0.000464    | 5.41E-05   | 0.078712 | 0.04319  |
| ATAD2   | 1      | 4    | 5               | 268948   | 18.59     | 0.000665    | 0.000969   | 0.092155 | 0.228538 |
| KRT8    | 4      | 0    | 4               | 113127   | 35.36     | 8.15E-06    | 0.00056    | 0.011922 | 0.174696 |
| OR4K15  | 0      | 3    | 3               | 60726    | 49.4      | 5.62E-05    | 0.000148   | 0.031695 | 0.078746 |
| CHRM2   | 0      | 3    | 3               | 92839    | 32.31     | 0.000162    | 0.000497   | 0.050177 | 0.171304 |
| UGT2B4  | 0      | 3    | 3               | 125650   | 23.88     | 0.000214    | 0.000896   | 0.056906 | 0.228538 |
| CRIPAK  | 3      | 2    | 5               | 100317   | 49.84     | 2.82E-05    | 2.74E-05   | 0.021596 | 0.030915 |
| SNTG1   | 0      | 3    | 3               | 107743   | 27.84     | 0.000367    | 0.001153   | 0.06998  | 0.240087 |
| COL6A1  | 6      | 0    | 6               | 231990   | 25.86     | 2.14E-07    | 9.34E-05   | 0.001025 | 0.057713 |
| RPSA    | 0      | 3    | 3               | 65878    | 45.54     | 6.47E-05    | 0.000178   | 0.034463 | 0.089813 |

For each gene, Likelihood-Ratio test (LRT) and the Convolution test (CT) were calculated to test the significance of enhanced mutations compared with the background rate and adjusted by false discovery rate (FDR).

**Supplementary Table 3. Target therapies of gene alterations and relevant clinical trials in cancer treatment.**

| <b>Gene</b> | <b>Drug</b>                          | <b>Clinical trials or preclinical studies (cancer type)</b> | <b>Phase</b> |
|-------------|--------------------------------------|-------------------------------------------------------------|--------------|
| AKT2        | Afuresertib                          | NCT04374630 (ovarian cancer)                                | Phase 2      |
| AURKA       | BPR1K871                             | PMID: 27863392 (acute myeloid leukemia)                     | Preclinical  |
| AXL         | Bemcentinib                          | NCT03824080 (acute myeloid Leukemia)                        | Phase 2      |
| BCL6        | FX1                                  | PMID: 27482887 (lymphoma)                                   | Preclinical  |
| BRCA2       | Niraparib                            | NCT04475939 (non small cell lung cancer)                    | Phase 3      |
|             |                                      | NCT04235101 (solid tumor)                                   | Phase 1      |
| CCND1       | Abemaciclib                          | NCT04584853 (breast cancer)                                 | Phase 3      |
|             |                                      | NCT04238819 (relapsed solid tumor)                          | Phase 1      |
| CCND3       | Abemaciclib                          | NCT04584853 (breast cancer)                                 | Phase 3      |
|             |                                      | NCT04238819 (relapsed solid tumor)                          | Phase 1      |
| CCNE1       | Dinaciclib                           | NCT01580228 (chronic lymphocytic leukemia)                  | Phase 3      |
|             |                                      | NCT01434316 (solid tumors)                                  | Phase 1      |
| CDK6        | Abemaciclib                          | NCT04584853 (breast cancer)                                 | Phase 3      |
|             |                                      | NCT04238819 (relapsed solid tumor)                          | Phase 1      |
| EGFR        | Gefitinib,<br>Erlotinib,<br>Afatinib | Non small cell lung cancer                                  | FDA approved |
| ERBB2       | Trastuzumab                          | Breast cancer, gastric cancer                               | FDA approved |
| ERBB3       | Sapitinib                            | NCT01579578 (metastatic gastric cancer)                     | Phase 2      |
| ERBB4       | Afatinib                             | Non small cell lung cancer                                  | FDA approved |
| FGFR2       | Futibatinib                          | NCT04024436 (metastatic breast cancer)                      | Phase 2      |
| FLT1        | Pazopanib                            | Advanced renal cell carcinoma and soft tissue sarcoma       | FDA approved |
| FLT3        | Gilteritinib                         | NCT02752035/NCT04027309 (acute myeloid leukemia)            | Phase 3      |
| IGF1R       | Brigatinib                           | NCT04111705 (metastatic non small cell lung cancer)         | Phase 2      |
| MCL1        | AZD5991                              | NCT03218683 (hematologic malignancy)                        | Phase 1      |
| MYC         | MYCi361                              | PMID: 31679823 (solid tumor)                                | Preclinical  |
| PAK1        | IPA-3                                | PMID: 32240651 (prostate cancer)                            | Preclinical  |
| PIK3CA      | CH5132799                            | NCT01222546 (advanced solid tumors)                         | Phase 1      |

**Supplementary Table 4. The comparison of genomic alterations in potentially targetable genes between AFPGC and TCGA-GC.**

|               | AFPGC (N=58) |                | TCGA-GC (N=393) |                | <i>P</i> |
|---------------|--------------|----------------|-----------------|----------------|----------|
|               | Alterations  | No alterations | Alterations     | No alterations |          |
|               | n(%)         | n(%)           | n(%)            | n(%)           |          |
| <i>ERBB2</i>  | 18(31.0)     | 40(69.0)       | 73(18.6)        | 320(81.4)      | 0.035    |
| <i>CCNE1</i>  | 17(29.3)     | 41(70.7)       | 50(12.7)        | 343(87.3)      | 0.002    |
| <i>MYC</i>    | 13(22.4)     | 45(77.6)       | 52(13.2)        | 341(86.8)      | 0.072    |
| <i>CCND1</i>  | 9(15.5)      | 49(84.5)       | 29(7.4)         | 364(92.6)      | 0.071*   |
| <i>MCL1</i>   | 8(13.8)      | 50(86.2)       | 17(4.3)         | 376(95.7)      | 0.009*   |
| <i>FLT1</i>   | 7(12.1)      | 51(87.9)       | 24(6.1)         | 369(93.9)      | 0.099*   |
| <i>ERBB3</i>  | 6(10.3)      | 52(89.7)       | 50(12.7)        | 343(87.3)      | 0.678    |
| <i>AURKA</i>  | 6(10.3)      | 52(89.7)       | 29(7.4)         | 364(92.6)      | 0.430*   |
| <i>AXL</i>    | 5(8.6)       | 53(91.4)       | 27(6.9)         | 366(93.1)      | 0.586*   |
| <i>BCL6</i>   | 5(8.6)       | 53(91.4)       | 29(7.4)         | 364(92.6)      | 0.789*   |
| <i>BRCA2</i>  | 5(8.6)       | 53(91.4)       | 37(9.4)         | 356(90.6)      | >0.999   |
| <i>EGFR</i>   | 5(8.6)       | 53(91.4)       | 37(9.4)         | 356(90.6)      | >0.999   |
| <i>ERBB4</i>  | 5(8.6)       | 53(91.4)       | 51(13.0)        | 342(87.0)      | 0.403    |
| <i>FGFR2</i>  | 5(8.6)       | 53(91.4)       | 30(7.6)         | 363(92.4)      | 0.792*   |
| <i>AKT2</i>   | 4(6.9)       | 54(93.1)       | 16(4.1)         | 377(95.9)      | 0.308*   |
| <i>PAK1</i>   | 4(6.9)       | 54(93.1)       | 17(4.3)         | 376(95.7)      | 0.330*   |
| <i>CCND3</i>  | 4(6.9)       | 54(93.1)       | 26(6.6)         | 367(93.4)      | >0.999*  |
| <i>CDK6</i>   | 4(6.9)       | 54(93.1)       | 36(9.2)         | 357(90.8)      | 0.636    |
| <i>FLT3</i>   | 4(6.9)       | 54(93.1)       | 20(5.1)         | 373(94.9)      | 0.532*   |
| <i>PIK3CA</i> | 4(6.9)       | 54(93.1)       | 86(21.9)        | 307(78.1)      | 0.007    |
| <i>IGF1R</i>  | 3(5.2)       | 55(94.8)       | 33(8.4)         | 360(91.6)      | 0.603*   |

\*P values were from two-sided Fisher's exact test and the others were from chi-square test, and were significant at < 0.05.

**Supplementary Table 5. Comparison of ERBB2 and CCNE1 amplifications in AFPGC and gastric cancer from TCGA.**

|                | AFPGC-105 |        | TCGA-GC |        |          | TCGA-CIN |        |          | TCGA-EBV |        |           | TCGA-GS |        |           | TCGA-MSI |        |           |
|----------------|-----------|--------|---------|--------|----------|----------|--------|----------|----------|--------|-----------|---------|--------|-----------|----------|--------|-----------|
|                | AMP       | No-AMP | AMP     | No-AMP | P value# | AMP      | No-AMP | P value# | AMP      | No-AMP | P value#  | AMP     | No-AMP | P value#  | AMP      | No-AMP | P value#  |
| <b>ERBB2##</b> | 34        | 71     | 46      | 347    | P<0.0001 | 44       | 159    | P=0.0406 | 0        | 63     | P<0.0001* | 3       | 24     | P=0.0311* | 1        | 43     | P<0.0001* |
| <b>CCNE1</b>   | 28        | 77     | 46      | 347    | P=0.0003 | 37       | 166    | P=0.0661 | 0        | 63     | P<0.0001* | 0       | 27     | P=0.0009* | 0        | 44     | P<0.0001* |

|              | AFPGC-58 |        | TCGA-GC |        |          | TCGA-CIN |        |          | TCGA-EBV |        |           | TCGA-GS |        |           | TCGA-MSI |        |           |
|--------------|----------|--------|---------|--------|----------|----------|--------|----------|----------|--------|-----------|---------|--------|-----------|----------|--------|-----------|
|              | AMP      | No-AMP | AMP     | No-AMP | P value# | AMP      | No-AMP | P value# | AMP      | No-AMP | P value#  | AMP     | No-AMP | P value#  | AMP      | No-AMP | P value#  |
| <b>ERBB2</b> | 16       | 42     | 55      | 338    | P=0.0080 | 44       | 159    | P=0.3454 | 0        | 63     | P<0.0001* | 3       | 24     | P=0.1028* | 1        | 43     | P=0.0004* |
| <b>CCNE1</b> | 17       | 41     | 46      | 347    | P=0.0001 | 37       | 166    | P=0.0853 | 0        | 63     | P<0.0001* | 0       | 27     | P=0.0011* | 0        | 44     | P<0.0001* |

AMP, amplification; No-AMP, No-amplification

\*P values were from two-sided Fisher's exact test and the others were from chi-square test, and were significant at < 0.05.

#P values were derived from the comparison between AFPGC and gastric cancer of TCGA (whole cohort or subtypes)

##The status of ERBB2 in AFPGC-105 cohort including ERBB2 FISH positive and ERBB2 amplifications

**Supplementary Table 6. Associations of ERBB2 and CCNE1 with clinicopathological parameters of AFPGC (N=105).**

| Parameters                     | ERBB2 positive | ERBB2 negative | <i>P</i> value | CCNE1 amplification | CCNE1 non-amplification | <i>P</i> value |
|--------------------------------|----------------|----------------|----------------|---------------------|-------------------------|----------------|
|                                | n(%)           | n(%)           |                | n(%)                | n(%)                    |                |
| <b>Sex</b>                     |                |                |                |                     |                         |                |
| Male                           | 23(67.6)       | 56(78.9)       |                | 24(85.7)            | 55(71.4)                |                |
| Female                         | 11(32.4)       | 15(21.1)       | 0.212          | 4(14.3)             | 22(28.6)                | 0.134          |
| <b>Age (years)</b>             |                |                |                |                     |                         |                |
| ≥60                            | 25(73.5)       | 53(74.6)       |                | 24(85.7)            | 54(70.1)                |                |
| <60                            | 9(26.5)        | 18(25.4)       | 0.902          | 4(14.3)             | 23(29.9)                | 0.106          |
| <b>TNM stage</b>               |                |                |                |                     |                         |                |
| I-II                           | 6(17.6)        | 27(38.0)       |                | 6(21.4)             | 27(35.1)                |                |
| III-IV                         | 28(82.4)       | 44(62.0)       | <b>0.035</b>   | 22(78.6)            | 50(64.9)                | 0.183          |
| <b>Histological pattern</b>    |                |                |                |                     |                         |                |
| Hepatoid                       | 12(35.3)       | 34(47.9)       |                | 10(35.7)            | 36(46.8)                |                |
| Tubular/Papillary              | 15(44.1)       | 28(39.4)       |                | 11(39.3)            | 32(41.6)                |                |
| Others                         | 7(20.6)        | 9(12.7)        | 0.357          | 7(25.0)             | 9(12.7)                 | 0.228          |
| <b>Lymphovascular invasion</b> |                |                |                |                     |                         |                |
| Positive                       | 22(84.6)       | 40(61.5)       |                | 19(90.5)            | 43(61.4)                |                |
| Negative                       | 4(15.4)        | 25(38.5)       | <b>0.033</b>   | 2(9.5)              | 27(38.6)                | <b>0.012</b>   |
| NA*                            | 8              | 6              |                | 7                   | 7                       |                |
| <b>Liver metastasis</b>        |                |                |                |                     |                         |                |
| Yes                            | 19(55.9)       | 23(32.9)       |                | 18(64.3)            | 24(31.6)                |                |
| No                             | 15(44.1)       | 47(67.1)       | <b>0.025</b>   | 10(35.7)            | 52(68.4)                | <b>0.003</b>   |
| NA**                           | 0              | 1              |                | 0                   | 1                       |                |

NA, not applicable

P values were from two-sided Fisher's exact test and the others were from chi-square test, and were significant at < 0.05.

\*The pathologic report did not indicate the presence of lymphovascular invasion

\*\*No follow-up information was available to confirm the presence of liver metastases

**Supplementary Table 7. Associations of combined ERBB2 and CCNE1 with clinicopathological parameters of AFPGC (N=105).**

| Parameters                     | ERBB2 <sup>N</sup> CCNE1 <sup>N</sup> | ERBB2 <sup>A</sup> CCNE1 <sup>N</sup> or<br>ERBB2 <sup>N</sup> CCNE1 <sup>A</sup> | ERBB2 <sup>A</sup> CCNE1 <sup>A</sup> | <i>P</i><br>value | <i>P</i><br>trend |
|--------------------------------|---------------------------------------|-----------------------------------------------------------------------------------|---------------------------------------|-------------------|-------------------|
|                                | n(%)                                  | n(%)                                                                              | n(%)                                  |                   |                   |
| <b>Sex</b>                     |                                       |                                                                                   |                                       | 0.983             | 0.902             |
| Male                           | 39(75.0)                              | 33(75.0)                                                                          | 7(77.8)                               |                   |                   |
| Female                         | 13(25.0)                              | 11(25.0)                                                                          | 2(22.2)                               |                   |                   |
| <b>Age (years)</b>             |                                       |                                                                                   |                                       | 0.499             | 0.309             |
| ≥60                            | 36(69.2)                              | 35(79.5)                                                                          | 7(77.8)                               |                   |                   |
| <60                            | 16(30.8)                              | 9(20.5)                                                                           | 2(22.2)                               |                   |                   |
| <b>TNM stage</b>               |                                       |                                                                                   |                                       | <b>0.047</b>      | <b>0.015</b>      |
| I-II                           | 22(42.3)                              | 10(22.7)                                                                          | 1(11.1)                               |                   |                   |
| III-IV                         | 30(57.7)                              | 34(77.3)                                                                          | 8(88.9)                               |                   |                   |
| <b>Histological pattern</b>    |                                       |                                                                                   |                                       | 0.291             | <b>0.044</b>      |
| Hepatoid                       | 26(50.0)                              | 18(40.9)                                                                          | 2(22.2)                               |                   |                   |
| Tubular/Papillary              | 21(40.4)                              | 18(40.9)                                                                          | 4(44.4)                               |                   |                   |
| Others                         | 5(9.6)                                | 8(18.2)                                                                           | 3(33.3)                               |                   |                   |
| <b>Lymphovascular invasion</b> |                                       |                                                                                   |                                       | <b>0.004</b>      | <b>0.001</b>      |
| Positive                       | 27(54.0)                              | 29(82.9)                                                                          | 6(100)                                |                   |                   |
| Negative                       | 23(46.0)                              | 6(17.1)                                                                           | 0(0)                                  |                   |                   |
| NA*                            | 2                                     | 9                                                                                 | 3                                     |                   |                   |
| <b>Liver metastasis</b>        |                                       |                                                                                   |                                       | <b>0.001</b>      | <b>&lt;0.001</b>  |
| Yes                            | 12(23.5)                              | 23(52.3)                                                                          | 7(77.8)                               |                   |                   |
| No                             | 39(76.5)                              | 21(47.7)                                                                          | 2(22.2)                               |                   |                   |
| NA**                           | 1                                     | 0                                                                                 | 0                                     |                   |                   |

NA, not applicable

P trend was calculated using linear trend test.

P values were from two-sided Fisher's exact test and the others were from chi-square test, and were significant at < 0.05.

\*The pathologic report did not indicate the presence of lymphovascular invasion

\*\*No follow-up information was available to confirm the presence of liver metastases

ERBB2<sup>N</sup>CCNE1<sup>N</sup>: ERBB2 non-amplification and CCNE1 non-amplification;

ERBB2<sup>A</sup>CCNE1<sup>N</sup>: ERBB2 amplification and CCNE1 non-amplification;

ERBB2<sup>N</sup>CCNE1<sup>A</sup>: ERBB2 non-amplification and CCNE1 amplification;

ERBB2<sup>A</sup>CCNE1<sup>A</sup>: ERBB2 amplification and CCNE1 amplification;

**Supplementary Table 8. Clinicopathological characteristics of AFPGC patients corresponding to PDX models**

| <b>Patient ID</b> | <b>PDX model</b> | <b>Gender</b> | <b>Age</b> | <b>Serum AFP (ng/ml)</b> | <b>TNM Stage ( 8th )</b> | <b>Differentiation</b> | <b>Lymphovascular invasion</b> | <b>Metastasis condition</b>     |
|-------------------|------------------|---------------|------------|--------------------------|--------------------------|------------------------|--------------------------------|---------------------------------|
| G04               | PDX9             | M             | 63         | 121.2                    | IV                       | Non-hepatoid           | Positive                       | liver metastasis (Synchronous)  |
| G06               | PDX7             | M             | 64         | 56.6                     | IV                       | Non-hepatoid           | Positive                       | liver metastasis (Metachronous) |
| G09               | PDX8             | M             | 58         | 47.2                     | IV                       | Hepatoid               | Positive                       | liver metastasis (Synchronous)  |
| G14               | PDX1             | M             | 70         | 23                       | IIIB                     | Non-hepatoid           | Positive                       | No                              |
| G22               | PDX5             | M             | 62         | 218.4                    | IIA                      | Hepatoid               | Positive                       | No                              |
| G23               | PDX6             | F             | 62         | 228                      | IV                       | Hepatoid               | Positive                       | liver metastasis (Synchronous)  |
| G26               | PDX11            | M             | 69         | 671                      | IB                       | Hepatoid               | Negative                       | No                              |
| G39               | PDX2             | M             | 73         | 985.7                    | IIIA                     | Hepatoid               | Positive                       | liver metastasis (Metachronous) |
| G52               | PDX3             | F             | 65         | 1245.8                   | IIIB                     | Non-hepatoid           | Positive                       | No                              |
| G71               | PDX4             | M             | 60         | 74.5                     | IIIC                     | Non-hepatoid           | Positive                       | No                              |
| G94               | PDX10            | M             | 70         | 34.5                     | IB                       | Non-hepatoid           | Unspecified                    | No                              |



### Supplementary Method

In AFPGC-total, Cytoplasmic staining in tumour cells for AFP was evaluated, a positive AFP status was defined as >1% staining of the tumour section<sup>1</sup>. National Comprehensive Cancer Network (NCCN) guidelines recommend assessment of ERBB2 overexpression using immunohistochemistry (IHC) and ERBB2 amplification using fluorescence in situ hybridization (FISH) or in situ hybridization (ISH). Positive (IHC 3+) or negative (IHC 0 or 1+) of ERBB2 status do not require further FISH testing (Type: evidence based; Quality of evidence: high; Strength of recommendation: strong). When ERBB2 status is equivocal (IHC 2+), FISH testing should be further performed to test the status of ERBB2 amplification. To make a better comparison, FISH testing was further performed on ERBB2 (IHC 3+) samples (22 cases). Previous studies also reported that the correlation between ERBB2 IHC 3+ and ERBB2 amplification in FISH was highly concordant (94%-100%<sup>2,3</sup>). The positive status of CCNE1 was defined as CCNE1 amplification by FISH. The concordance correlation between ERBB2 IHC 3+ and ERBB2 amplification in FISH was highly concordant<sup>2,4</sup>.

### Supplementary References

- 1 Murakami, T. *et al.* Clinicopathologic and immunohistochemical characteristics of gastric adenocarcinoma with enteroblastic differentiation: a study of 29 cases. *Gastric Cancer* **19**, 498-507, doi:10.1007/s10120-015-0497-9 (2016).
- 2 Bang, Y. J. *et al.* Trastuzumab in combination with chemotherapy versus chemotherapy alone for treatment of HER2-positive advanced gastric or gastro-oesophageal junction cancer (ToGA): a phase 3, open-label, randomised controlled trial. *Lancet* **376**, 687-697, doi:10.1016/S0140-6736(10)61121-X (2010).
- 3 Bartley, A. N. *et al.* HER2 Testing and Clinical Decision Making in Gastroesophageal Adenocarcinoma: Guideline From the College of American Pathologists, American Society for Clinical Pathology, and the American Society of Clinical Oncology. *J Clin Oncol* **35**, 446-464, doi:10.1200/JCO.2016.69.4836 (2017).
- 4 Bartley, A. N. *et al.* HER2 Testing and Clinical Decision Making in Gastroesophageal Adenocarcinoma: Guideline From the College of American Pathologists, American Society for Clinical Pathology, and the American Society of Clinical Oncology. *Journal of Clinical Oncology* **35**, 446-464, doi:10.1200/jco.2016.69.4836 (2017).
